# Supplementary material for: Leaf functional trait variation in a humid temperate forest, and relationships with juvenile tree light requirements
Source: PeerJ. 2019 May 8;7:e6855. doi: 10.7717/peerj.6855 (PMC6511228; doi:10.7717/peerj.6855)
Supplement: Supplemental Information 1 [file peerj-07-6855-s001.xlsx]

## Sheet: Sheet1
Species	Light	LMA (cm2 g-1)	DMC (%)	Density (g cm-3)	Thickness (mm)
Aleexc	Gap	117.747	49.0196	0.510204	0.230784
Aleexc	Gap	81.6168	44.0714	0.391313	0.208571
Aleexc	Gap	63.4427	43.7294	0.309476	0.205
Aleexc	Gap	92.0669	50	0.571429	0.200599
Ariser	Gap	72.6045	33.3333	0.326531	0.222351
Ariser	Gap	47.5945	29.6296	0.27907	0.170547
Ariser	Gap	45.1483	27.8269	0.167907	0.268889
Ariser	Gap	35.3109	26.0084	0.124334	0.284
Beitaw	Gap	143.552	42.8571	0.473684	0.303054
Beitaw	Gap	85.3707	43.8272	0.411425	0.2075
Beitaw	Gap	84.946	41.2698	0.426507	0.199167
Beitaw	Gap	85.9944	43.3004	0.418028	0.205714
Brarep	Gap	77.1354	33.75	0.385714	0.199981
Brarep	Gap	78.7576	27.5862	0.280702	0.280574
Brarep	Gap	90.8306	28.777	0.266667	0.340615
Brarep	Gap	88.2698	30.4045	0.221289	0.398889
Carser	Gap	72.5642	28.9474	0.305556	0.237483
Carser	Gap	39.1645	26.087	0.225949	0.173333
Carser	Gap	43.3013	28.0899	0.185048	0.234
Carser	Gap	67.26	31.0199	0.263765	0.255
Carser	Gap	66.7797	39.0099	0.275949	0.242
Carser	Gap	42.4408	25.6044	0.178698	0.2375
Carser	Gap	82.144	30.7692	0.313725	0.236551
Copgra	Gap	104.201	30.7547	0.291071	0.357992
Copgra	Gap	83.9356	28.5714	0.28125	0.298438
Copgra	Gap	91.8836	30.1508	0.3	0.306279
Copgra	Gap	43.6321	18.7817	0.112599	0.3875
Copgra	Gap	48.9652	20.2795	0.126362	0.3875
Copgra	Gap	50.2043	20.307	0.137924	0.364
Copgra	Gap	64.7968	23.3884	0.186588	0.347273
Copgra	Gap	61.779	25.7754	0.177526	0.348
Coprob	Gap	104.085	36.3636	0.347826	0.299245
Coprob	Gap	63.4813	25.9669	0.198379	0.32
Coprob	Gap	64.0665	23.8005	0.194879	0.32875
Coprob	Gap	51.4388	22.6027	0.178918	0.2875
Coprob	Gap	85.6098	31.3393	0.272643	0.314
Coprob	Gap	60.5982	24.2456	0.174802	0.346667
Eladen	Gap	112.071	47.3684	0.461538	0.242821
Eladen	Gap	47.2713	32.6859	0.244507	0.193333
Eladen	Gap	62.054	35.2113	0.239507	0.259091
Eladen	Gap	62.054	35.2113	0.239507	0.259091
Eladen	Gap	107.573	44.8611	0.430667	0.242011
Genrup	Gap	73.2626	23.3333	0.2	0.366313
Genrup	Gap	45.0492	20	0.181481	0.24823
Genrup	Gap	60.4089	18.1988	0.148243	0.4075
Genrup	Gap	78.4724	19.0476	0.173913	0.365519
Hedarb	Gap	88.6525	27.2727	0.25	0.35461
Hedarb	Gap	90.4114	25.7143	0.236842	0.386
Hedarb	Gap	79.0952	23.8095	0.212766	0.386
Hedarb	Gap	58.1741	21.8762	0.15071	0.386
Hedarb	Gap	65.1445	21.5909	0.169808	0.383636
Hedarb	Gap	55.9727	23.2075	0.149593	0.374167
Hedarb	Gap	63.935	24.5924	0.193742	0.33
Kniexc	Gap	109.501	40.7965	0.310642	0.3525
Kniexc	Gap	108.056	41.5441	0.296496	0.364444
Kniexc	Gap	88.0753	43.2238	0.293584	0.3
Kniexc	Gap	120.365	44.8725	0.334347	0.36
Launov	Gap	124.629	28.3784	0.256098	0.279665
Launov	Gap	63.4391	25.2475	0.174832	0.362857
Launov	Gap	74.7698	24.0237	0.161374	0.463333
Launov	Gap	78.125	27.027	0.2	0.364865
Launov	Gap	86.1244	25.7143	0.211765	0.350794
Launov	Gap	40.0433	16.4262	0.112798	0.355
Launov	Gap	117.504	29.8077	0.267241	0.422391
Litcal	Gap	117.02	38.5714	0.364865	0.16836
Litcal	Gap	88.3087	33.8235	0.338235	0.195652
Litcal	Gap	50.5592	24.0363	0.176369	0.286667
Litcal	Gap	76.8071	33.2753	0.238778	0.321667
Litcal	Gap	82.5559	33.4761	0.260019	0.3175
Melram	Gap	79.4696	35	0.346535	0.187571
Melram	Gap	87.1986	25.2427	0.247619	0.301904
Melram	Gap	64.7589	21.4286	0.216495	0.362925
Melram	Gap	90.2935	27.1605	0.255814	0.284736
Melram	Gap	47.938	22.451	0.145267	0.33
Melram	Gap	70.5195	28.2895	0.275641	0.295944
Myraus	Gap	86.0759	33.1384	0.276704	0.321667
Myraus	Gap	79.6597	33.6968	0.267594	0.312857
Myraus	Gap	84.9421	33.8462	0.25462	0.281429
Myraus	Gap	85.729	33.1349	0.301825	0.305714
Myraus	Gap	82.1239	35.4198	0.276502	0.288182
Pitten	Gap	90.2652	33.3333	0.325	0.28875
Pitten	Gap	49.7477	28.9308	0.276376	0.18
Pitten	Gap	46.9101	46.6667	0.477273	0.0982878
Pitten	Gap	83.5398	39.5973	0.290935	0.287143
Pitten	Gap	105.541	36.3636	0.421053	0.209983
Psearb	Gap	105.393	31.6322	0.197612	0.533333
Psearb	Gap	117.856	33.9707	0.228846	0.515
Psearb	Gap	117.112	31.2914	0.266163	0.44
Psearb	Gap	114.751	31.746	0.263158	0.467915
Schdig	Gap	77.4016	27.9412	0.25	0.288235
Schdig	Gap	67.0116	25.9259	0.241379	0.306878
Schdig	Gap	83.8223	27.1186	0.242424	0.300636
Schdig	Gap	84.12	19.6543	0.275803	0.305
Schdig	Gap	66.4843	26.5306	0.22807	0.306089
Weirac	Gap	123.776	38.552	0.331173	0.37375
Weirac	Gap	86.6295	33.9891	0.288765	0.3
Weirac	Gap	92.7027	33.3333	0.285239	0.325
Weirac	Gap	122.298	38.5191	0.352782	0.346667
Weirac	Gap	94.6134	35.3903	0.314069	0.30125
Weirac	Gap	99.5115	37.5427	0.318947	0.312
Aleexc	Shade	53.6092	47.0588	0.571429	0.0938162
Aleexc	Shade	57.8263	42.8571	0.6	0.0963772
Aleexc	Shade	59.0478	42.8571	0.6	0.0984129
Aleexc	Shade	51.9862	46.6667	0.608696	0.085406
Aleexc	Shade	49.0515	37.8661	0.213267	0.23
Aleexc	Shade	57.4597	44.9704	0.389557	0.1475
Aleexc	Shade	60.5183	39.3939	0.464286	0.130347
Ariser	Shade	29.5189	24.3902	0.215054	0.137263
Ariser	Shade	30.508	26.6667	0.255319	0.11949
Ariser	Shade	35.4109	27.9861	0.211408	0.1675
Ariser	Shade	39.8674	21.875	0.233333	0.17086
Beitaw	Shade	70.5442	41.6667	0.47619	0.148143
Beitaw	Shade	75.5008	39.1304	0.5	0.151002
Beitaw	Shade	78.8732	43.75	0.390462	0.202
Beitaw	Shade	73.3607	35.8	0.346586	0.211667
Beitaw	Shade	73.9334	43.1818	0.5	0.147867
Brarep	Shade	43.5629	21.4286	0.1875	0.232335
Brarep	Shade	41.0095	19.6078	0.188679	0.21735
Brarep	Shade	41.7806	21.9298	0.158948	0.262857
Brarep	Shade	56.5012	25.3968	0.253968	0.222473
Carser	Shade	28.3402	20	0.257143	0.110212
Carser	Shade	32.7049	26.6667	0.25	0.130819
Carser	Shade	28.6104	23.3333	0.233333	0.122616
Carser	Shade	28.5652	28.3333	0.309091	0.0924168
Copgra	Shade	48.6405	22.2222	0.204082	0.238338
Copgra	Shade	44.332	21.4286	0.152869	0.29
Copgra	Shade	45.6121	19.4444	0.170732	0.267157
Copgra	Shade	51.88	23	0.17	0.31
Eladen	Shade	43.5974	30.7692	0.235294	0.185289
Eladen	Shade	44.3689	36.9565	0.314815	0.140937
Eladen	Shade	40.7422	38.8889	0.304348	0.133867
Eladen	Shade	40.9279	35.8974	0.28	0.146171
Genrup	Shade	37.728	15.6863	0.129032	0.292392
Genrup	Shade	33.9292	14.8148	0.117647	0.288398
Genrup	Shade	32.0799	18.5714	0.154762	0.207286
Genrup	Shade	29.2632	13.7762	0.0962606	0.304
Genrup	Shade	29.8893	13.7521	0.0985362	0.303333
Genrup	Shade	37.263	14.898	0.123729	0.301166
Hedarb	Shade	59.4003	19.403	0.175676	0.338125
Hedarb	Shade	63.2126	24.4444	0.215686	0.293076
Hedarb	Shade	55.0108	22.2222	0.186047	0.295683
Hedarb	Shade	61.8465	24.5902	0.217391	0.284494
Hedarb	Shade	45.7831	21.1307	0.155197	0.295
Hedarb	Shade	53.3099	19.1877	0.150169	0.355
Hedarb	Shade	69.5074	25.6098	0.228261	0.304509
Kniexc	Shade	76.3791	43.5484	0.402985	0.189533
Kniexc	Shade	72.1605	43.1373	0.4	0.180401
Kniexc	Shade	77.0411	39.6056	0.290721	0.265
Kniexc	Shade	76.6556	39.5833	0.395833	0.193656
Launov	Shade	48.0769	26.087	0.20339	0.236378
Launov	Shade	44.2329	22.7273	0.172414	0.256551
Launov	Shade	66.0527	28	0.225806	0.292519
Launov	Shade	53.5936	20.9951	0.145833	0.3675
Launov	Shade	71.2669	27.2727	0.206897	0.344457
Litcal	Shade	54.7945	26.4901	0.25974	0.210959
Litcal	Shade	62.5365	30	0.296296	0.211061
Litcal	Shade	60.5134	27.9188	0.270956	0.223333
Litcal	Shade	50.4965	22.9529	0.229529	0.22
Litcal	Shade	70.7993	31.8182	0.311111	0.227569
Melram	Shade	50.4157	23.7037	0.21157	0.238293
Melram	Shade	41.8158	23.8095	0.214286	0.19514
Melram	Shade	45.5628	21.3333	0.2	0.227814
Melram	Shade	35.002	18.1011	0.119665	0.2925
Melram	Shade	52.1818	23.6842	0.209302	0.249313
Myraus	Shade	55.5394	26.983	0.222157	0.25
Myraus	Shade	57.0743	29.602	0.238916	0.238889
Myraus	Shade	53.1995	30.6064	0.277563	0.191667
Myraus	Shade	60.0375	32.6531	0.250156	0.24
Myraus	Shade	54.215	31.685	0.238833	0.227
Pitten	Shade	34.9085	25	0.272727	0.127998
Pitten	Shade	45.6579	34.6154	0.3	0.152193
Pitten	Shade	44.6882	25	0.285714	0.156409
Pitten	Shade	41.4761	33.6364	0.37	0.112098
Psearb	Shade	75.5572	23.7288	0.189189	0.399374
Psearb	Shade	70.1565	23.2143	0.188406	0.372369
Psearb	Shade	63.5538	28.4579	0.184749	0.344
Psearb	Shade	52.3781	26.9035	0.199747	0.262222
Schdig	Shade	37.1079	20.9302	0.1875	0.197909
Schdig	Shade	35.5523	18.3333	0.157143	0.226242
Schdig	Shade	31.6151	18.75	0.163636	0.193203
Schdig	Shade	36.7218	16	0.166667	0.220331
Weirac	Shade	83.1793	37.5	0.391304	0.212569
Weirac	Shade	75.7637	36.9565	0.346939	0.218378
Weirac	Shade	69.3869	31.6733	0.285711	0.242857
Weirac	Shade	59.3448	30.4408	0.265723	0.223333
